1 **The spatial and metabolic basis of colony size variation**

2

3 Jeremy Chacón<sup>1,2</sup>, Wolfram Möbius<sup>3,4</sup>, William Harcombe<sup>1,2</sup>

4

5 <sup>1</sup> Department of Ecology, Evolution and Behavior, University of Minnesota, St. Paul, MN, USA

6 <sup>2</sup> BioTechnology Institute, University of Minnesota, St. Paul, MN, USA

7 <sup>3</sup> Living Systems Institute, University of Exeter, Exeter, UK

8 <sup>4</sup> College of Engineering, Mathematics and Physical Sciences, University of Exeter, Exeter, UK

9

10 **Running Title** – Location’s effect on competition between colonies

11

12

13 **Corresponding Author**

14 William Harcombe

15 1479 Gortner Ave.

16 St. Paul, Minnesota, 55108

17 612-301-1164

18 612-625-5780 (fax)

19 [harcombe@umn.edu](mailto:harcombe@umn.edu)

20

21 **Conflicts of interest**

22 The authors declare no conflicts of interest.

23

24 **Subject Category**

25 Microbial population and community ecology

26 **Abstract**

27 Spatial structure impacts microbial growth and interactions, with ecological and evolutionary  
28 consequences. It is therefore important to quantitatively understand how spatial proximity  
29 affects interactions in different environments. We test how proximity influences colony size  
30 when either *Escherichia coli* or *Salmonella enterica* are grown on different carbon sources. The  
31 importance of colony location changes with species and carbon source. Spatially-explicit,  
32 genome-scale metabolic modeling predicts colony size variation, supporting the hypothesis that  
33 metabolic mechanisms and diffusion are sufficient to explain the majority of observed  
34 variation. Geometrically, individual colony sizes are best predicted by Voronoi diagrams, which  
35 identify the territory that is closest to each colony. This means that relative colony growth is  
36 largely independent of the distance to colonies beyond those that set territory boundaries.  
37 Further, the effect of location increases when colonies take-up resource quickly relative to the  
38 diffusion of limiting resources. These analyses made it apparent that the importance of location  
39 was smaller than expected for experiments with colonies growing on sugars. The accumulation  
40 of toxic byproducts appears to limit the growth of large colonies and reduce variation in colony  
41 size. Our work provides an experimentally and theoretically grounded understanding of how  
42 location interacts with metabolism and diffusion to influence microbial interactions.

43

44 **Introduction**

45 Microbial interactions help determine ecosystem functions, from global nutrient cycling to  
46 human health(Cho & Blaser 2012; Arrigo 2005). Spatial structure mediates microbial  
47 interactions (Connell et al. 2014), however, the relationship between proximity and strength of  
48 interaction remains unclear (Nadell et al. 2016). Quantifying, and being able to predict, the  
49 effect of location on microbial interactions is critical for understanding processes from the  
50 community evolutionary-ecology of microbial ecosystems to emergent functions such as human  
51 health.

52

53 Spatial structure modulates the resource competition that shapes microbial communities (Mitri  
54 & Foster 2013, Foster & Bell 2012, Stacey et al 2016). The relative strength of competition  
55 influences community assembly (David et al. 2015) and stability (Shade et al. 2012), in addition  
56 to shaping the selection on microbial traits (Gerardin et al. 2016). Spatial structure alters the  
57 scope of competition (Mitri & Foster 2013). In agitated liquid environments all cells tend to  
58 have equal access to resources and interactions are global. In contrast, in structured  
59 environments, cells interact more strongly with neighbors than with distant individuals. This  
60 localizing effect of spatial structure has been repeatedly shown to influence the outcomes of  
61 microbial evo-ecological experiments (Gerardin et al. 2016; Mitri et al. 2015; Harcombe et al.  
62 2014; Allen et al. 2013; Allison 2005; Kim et al. 2008; Hansen et al. 2007; Kerr et al. 2002; Greig  
63 & Travisano 2008; Dechesne et al. 2008; Chao & Levin 1981; Penn et al. 2012; Gralka et al.  
64 2016).

65

66 The specific location of bacteria in spatially-structured environments matters. Within a biofilm  
67 or colony, bacteria at the edge have smaller local density and grow faster than those in the  
68 center (Persat et al. 2015; Gandhi et al. 2016; Nadell et al. 2016; Pirt 1967), which can segregate  
69 competing genotypes (Korolev et al. 2012; Mitri et al. 2015; Hallatschek & Nelson 2010;  
70 Hallatschek et al. 2007; Momeni et al. 2014). Between-colony interactions are also influenced  
71 by colonies' locations. A competing colony's effect is magnified if it is located between a focal  
72 colony and a nutrient source(Harcombe et al. 2014). Further, the coexistence of competing  
73 genotypes can be highly sensitive to the distance between colonies (Gerardin et al. 2016; Kim et  
74 al. 2008). Finally, hints of the importance of location are also being detected in complex natural  
75 ecosystems, such as in the microbiome. For example, changes in the spacing between  
76 *Aggregatibacter actinomycetemcomitans* and *Streptococcus gordonii* determine virulence in  
77 oral abscesses(Stacy et al. 2014).

78

79 While it is known that location matters, we lack a rigorous framework for understanding and  
80 predicting the impact of location on interactions. Interaction strength can be a function of  
81 distance(Kim et al. 2008), but by what distance-based measurement? The distance to the  
82 closest competitor, a function of all competitor distances, or a measurement of how  
83 competitors divide the available territory? Ecologists often use distance metrics to explain  
84 variance in plant growth(Tome & Burkhart 1989), and a linearly-weighted distance model  
85 captured a decline in bacterial colony size due to crowding (Guillier et al. 2006). In contrast,  
86 Voronoi diagrams, which measure the territory that is closer to a focal colony than any other  
87 colonies(Okabe et al. 2000), have been used to investigate pattern formation as bacteria cover

88 a surface(Lloyd & Allen 2015). To date there has not been a rigorous test of the ability of  
89 different geometric models to explain variance in colony size.

90

91 In addition to this geometric description, the question arises what minimal biophysical model  
92 can predict the location-based effects on colony growth in variable environments. Microbes  
93 typically interact through the chemical compounds that they consume and excrete(Germerodt  
94 et al. 2016; Hibbing et al. 2010). Does accounting for metabolism and diffusion suffice to predict  
95 the variation in colony growth? Genome-scale metabolic models and flux balance analysis can  
96 quantitatively predict the metabolites that microbes consume and excrete, and therefore can  
97 predict the ecological interactions that emerge from intracellular mechanisms (Orth et al. 2010;  
98 Mahadevan et al. 2002; Harcombe et al. 2014). Further, diffusion of biomass and nutrients can  
99 be incorporated to predict system dynamics in structured environments (Harcombe et al.  
100 2014). We therefore can test whether colony variation is purely a function of metabolism and  
101 diffusion by comparing computational predictions against experimental observations. If factors  
102 such as toxicity, signals or stochastic differences in lag time drive colony variation then the  
103 model, which does not take these effects into account, will do a poor job. Determining the  
104 extent to which metabolic mechanisms drive spatial effects will be critical for predicting growth  
105 in complex natural settings.

106

107 Here we investigated how location influences interactions in arguably the simplest scenario –  
108 monocultures grown on homogeneous surfaces. We plated monocultures of either *Escherichia*  
109 *coli* or *Salmonella enterica* on various media and used high-resolution scanners to investigate

110 the size of colonies and the associated variance within each plate. We then used simulations  
111 and geometric descriptions of varying complexity to determine how much of the colony  
112 variation could be explained by metabolic mechanisms, what aspect of location best explained  
113 variation in growth, and how variation was influenced by changes in either nutrient uptake or  
114 diffusion. Finally, we investigated one case in which variation differed from expectation and  
115 suggest that this deviation was caused by byproduct toxicity. Our work provides a quantitative  
116 framework for understanding and predicting the effect of location on colony growth which is  
117 independent of both microscopic parameters and knowledge of the positions of the non-  
118 nearest neighbors.

119

## 120 **Methods**

### 121 ***Strains and media***

122 We used cells of either *Salmonella enterica* subsp. *Typhimurium* LT2 or *Escherichia coli* K12-MG1655 as  
123 our model species. In the genome-scale metabolic modeling, these strains were represented by the  
124 iRR\_1083 model (Raghunathan et al. 2009) and the ijo\_1366 model (Orth et al. 2011), respectively. The  
125 Petri dish experiments either used LB media (10g/L tryptone, 10g/L NaCl, 5g/L yeast extract) or a  
126 modified Hypo minimal media (7.26mM K<sub>2</sub>HPO<sub>4</sub>, 0.88 mM NaH<sub>2</sub>PO<sub>4</sub>, 3.78 mM [NH<sub>4</sub>]<sub>2</sub>SO<sub>4</sub>, 0.41 mM  
127 MgSO<sub>4</sub>, 1 ml of a metal mix (Delaney et al. 2013)), with either glucose (8.34 mM), citrate (5.10 mM),  
128 lactose (4.17 mM), or acetate (12.5 mM) as the limiting resource. All Petri dishes had 1% agar. Dishes  
129 were left open under UV for 30 minutes.

130

131 For Petri dish experiments, cells from a 1-day old colony were used. After spreading cells onto a Petri  
132 dish, a thin piece of black plastic was placed within the upper lid of the dish to improve contrast and

133 reduce reflections from the Petri dish lid. Petri dishes were then placed onto a Canon Perfection V600  
134 scanner agar side down and a 600dpi image was scanned every 20 minutes for almost 150 hours. Each  
135 treatment (a unique combination of a species and a media type) was repeated 4-8 times.

136

### 137 ***Image Analysis***

138 Tracking of colony areas over time was performed in three main steps using custom software in Matlab  
139 (Supplementary material). First, the initial colony locations were detected. Then, the final colony areas  
140 were measured and merged colonies were separated (Fig. 1A). Finally, using the outlines of the final  
141 colony areas, the area of each colony was tracked through time. We measured the growth rate of  
142 colonies on Petri dishes via the diameter of a hypothetical circular colony with same area (Wimpenny  
143 1979). The growth rate was calculated by regressing diameter over time for the first four hours (12  
144 frames) once growth was detected.

145

### 146 ***Computational Modeling***

147 All simulations were run in COMETS, a platform developed to do spatially-explicit dynamic flux-balance  
148 analysis simulations with an arbitrary number of species (Harcombe et al. 2014). Simulations were  
149 carried out using the University of Minnesota Supercomputing Institute's Mesabi cluster. COMETS uses  
150 dynamic flux balance analysis to predict bacterial growth over time by maximizing the amount of  
151 biomass which can be produced by a species' metabolic model given the resources in the local  
152 environment (Mahadevan et al. 2002). Michaelis-Menten kinetics constrain resource uptake, with the  
153 maximum set by  $v_{max}$  and the concentration at which uptake is at half-maximum set by  $k_m$ . In  
154 addition, we ran simplified reaction-diffusion simulations in COMETS by using a metabolic model with a  
155 single carbon uptake reaction, paired with a reaction that converted all intracellular carbon directly to  
156 biomass. In this simplified case uptake kinetics exactly match growth kinetics.

157

158 COMETS simulates growth in spatially-explicit environments by solving dynamic flux balance analyses in  
159 discrete “boxes” within a lattice at each time step, and then allowing diffusion of the resources and  
160 biomass among boxes between time steps. Each box can contain different amounts of biomass or  
161 resources, which determine the outcome of the dynamic flux balance analysis. Biomass and resources  
162 each diffuse to neighboring boxes with specific diffusion coefficients. The time-step and box sizes we  
163 used were small enough to not cause a change in results if we reduced these sizes further.

164

165 The starting conditions, and length of time the simulations ran, depended on the question of interest.  
166 For the simulations in figures 3 and 4 the “world” was a 5 cm x 5 cm square, into which 60 colonies were  
167 seeded at random locations, with initial biomasses of 1e-10 grams. Resources were distributed  
168 uniformly at a concentration of 1e-6 mmol per box for the limiting resource, and at essentially infinite  
169 abundance for non-limiting resources. These simulations were run until resources were fully consumed.  
170 The genome-scale metabolic model simulations, Fig. 2, were conducted in circular environments that  
171 were 90 mm in diameter to mimic the experimental conditions. Biomass was seeded at the same  
172 location as observed in experiments, and the concentration of the limiting resource also matched the  
173 laboratory conditions. Genome-scale simulations were run for equal lengths of time as the laboratory  
174 experiments. Other simulation parameters are provided in Table 1.

175

#### 176 *Statistics*

177 The Voronoi areas and other distance metrics (nearest neighbor, summed inverse distances, summed  
178 squared inverse distance) were all calculated in R. To find the Voronoi areas of colonies, we used the  
179 spatstat package in R and ran the dirichletArea function. After calculation of any distance metric,



180 colonies <5mm from a Petri dish edge were excluded, i.e., the colonies were not included in the analysis,  
181 but they did contribute to the distance metric for included colonies.

182

183 We used relative metrics to compare yields between treatments and between experiments and  
184 simulations. We compared variation in colony yield on different carbon sources by first calculating the  
185 coefficient of variation in colony area for each Petri dish, then used a single factor ANOVA to compare  
186 the coefficient of variation between experimental treatments. Similarly, to compare experiment to  
187 simulation the yields at the end of growth, in units of area for the experiments and grams for the  
188 simulations, were divided by the total yield in each Petri dish or simulation area to obtain dimensionless  
189 values that could be directly compared. The experimental relative yields were compared with the  
190 simulation predictions using mixed-effects linear regression, with the Petri dish as a random factor and  
191 the treatment as a fixed factor.

192

193 To compare the strength of spatial competition among groups (media type, resource quality), we did an  
194 ANOVA followed by Tukey's Honest Significant Difference multiple comparisons test. The level of  
195 replication was the Petri dish. We conducted a t-test to test whether adding acetate to *S. enterica* Petri  
196 dishes with glucose altered the strength of spatial competition.

197

## 198 **Results**

199

200 *The amount of variation in size between colonies on a surface depends on the resources and*  
201 *species identity*

202

203 We tested whether species and resource identity influenced the variance in colony size within

204 monoculture plates. Approximately 60 cells of either *S. enterica* or *E. coli* were grown on 1%  
205 agar Petri dishes with different carbon sources, with 4-8 dishes per treatment. Colony areas  
206 were measured using flatbed scanners and custom software (Fig. 1A, see methods for more  
207 detail). Within every plate/replicate and treatment we found a range of colony sizes, as seen in  
208 the example density plots of the final colony areas in Fig. 1B, suggesting location was important  
209 for size variation. Because the *average* colony size differed substantially across treatments (see,  
210 for example, Fig. 1B), we used the coefficient of variation of final colony area (standard  
211 deviation over mean) within a plate to compare variation in colony size between treatments.  
212 Differences in media and species caused large differences in the coefficient of variation across  
213 treatment (ANOVA,  $F(7,32) = 18.9$ ,  $p = 1.07e-9$ , Fig. 1C), suggesting that spatial effects were  
214 highly context dependent.

215

216 *The effects of resource and species identity on the variance in colony size can be predicted with*  
217 *models that pair metabolism and diffusion.*

218

219 We tested whether the observed variations in colony size could be predicted from the interplay  
220 of intracellular metabolic mechanisms, diffusion, and colony location, by running simulations  
221 that combine genome-scale metabolic modeling with diffusion calculations. Our computational  
222 platform, COMETS, uses dynamic flux-balance analysis to predict the growth and metabolic  
223 activity of bacteria by identifying the metabolic strategy that maximizes biomass production at  
224 each time step (Mahadevan et al. 2002; Harcombe et al. 2014). Biomass and metabolites  
225 diffuse to simulate growing colonies and the resource gradients that arise as a result of

226 microbial metabolism. Note that this does not mean that colonies spread by diffusion alone  
227 from the center of the colony. Rather, the combined action of diffusion and growth leads to  
228 biomass spread (Murray 2002).

229

230 Simulations were initiated with resources and colony locations that matched each experimental  
231 plate (Fig. 2A). We plotted the relative yields (yield of a colony / total yield on a Petri dish) for  
232 simulations against those for experiments (Fig. 2B). We used relative yields because the  
233 measurements of interest were the relative differences between colonies on a plate, which can  
234 be compared with relative numbers even if the specific yield measurement (area vs biomass)  
235 differs. The relative colony sizes in simulations were well correlated with the relative colony  
236 sizes in experiments, although the predictive ability of the simulations depended on the  
237 treatment (mixed-effects linear regression with subsequent F tests, main effect of simulated  
238 yields:  $F(1,1479) = 2027$ ,  $p < 2.2e-16$ , main effect of treatment:  $F(5,24) = 11$ ,  $p = 1.3e-5$ ,  
239 interaction:  $F(5,1470) = 85$ ,  $p < 2.2e-16$ ). Deviations from simulated predictions had a slope  $< 1$ ,  
240 meaning there was more variability in colony size in simulations than in experiments, which  
241 occurred and was most pronounced when the carbon resource was a sugar (i.e. glucose or  
242 lactose). Below we further explore the deviations caused by growth on sugars.

243

244 *Relative colony size is driven by the location of adjacent competitors*

245

246 To more extensively investigate how location determines colony size we simplified our model  
247 to allow faster simulation and abstract species/environment-specific intracellular metabolism.

248 We replaced the genome-scale metabolic model with a set of differential equations, which  
249 describe a reaction-diffusion system in which bacteria grow under Monod kinetics: The growth  
250 rate  $f(B,R)$  depends on biomass concentration  $B$  and resource concentration  $R$ . Bacteria and  
251 resource spread via diffusion, with the diffusion coefficient for the bacteria  $D_B$  being much  
252 smaller than that for the resource,  $D_R$  (equations 1):

253

$$\frac{\partial B}{\partial t} = D_B \nabla^2 B + f(B,R) \tag{1a}$$

254

255

$$\frac{\partial R}{\partial t} = D_R \nabla^2 R - f(B,R) \tag{1b}$$

256

257

258

$$f(B,R) = B \frac{v_{max} R}{k_m + R} \tag{1c}$$

259

260

261

262 The first term in each of the differential equations describes diffusion ( $\nabla^2$  is the two-  
263 dimensional Laplacian operator.), the second term (the “reaction” term) describes conversion  
264 of the resource into biomass which occurs with the same efficiency independent of the growth  
265 rate. The maximum growth rate,  $v_{max}$ , is approached as the resource concentration  $R$   
266 increases, with half-maximum growth rate attained when the resource concentration is equal  
267 to the saturation constant  $k_m$ .

268

269 With this model, we sought a distance-based metric that could predict colony size  
270 independently of intracellular details, focusing on metrics that had previous use in the forestry  
271 or microbiology literature (Tome & Burkhardt 1989; Guillier et al. 2006; Lloyd & Allen 2015). We  
272 first simulated conditions that caused strong spatial effects (large variance in colony size),  
273 which used a high growth rate ( $v_{max} = 1$ ). We tested whether colony size could be best  
274 predicted by the distance to the nearest neighbor (Fig. 3A), the sum of the inverse distances to  
275 all neighbors (Fig. 3B), the log of the sum of the squared inverse distances (Fig. 3C), or a  
276 colony's Voronoi area, which is the area on the Petri dish which is closer to the focal colony  
277 than to any other colony (Fig. 3D) (Okabe et al. 2000). While all metrics were somewhat  
278 predictive of colony size, the Voronoi areas had almost perfect prediction.

279  
280 To further test whether Voronoi neighbors are the primary competitors, we ran "dropout"  
281 simulations, in which we repeatedly simulated the same environment (i.e. founding cell  
282 locations) but removed a different seed of a colony from each simulation. We then determined  
283 the impact that each removal had on focal colony sizes, to test the effect of removing a Voronoi  
284 neighbor vs. a non-Voronoi neighbor. Removing Voronoi neighbor colonies had much larger  
285 effects than removing non-Voronoi neighbors, Fig. 3F (t.test,  $p = 5.6e-7$ ). Taken together, this  
286 means that colonies that determined territory boundaries (the Voronoi neighbors) played the  
287 most important role in causing spatial effects.

288  
289 Finally, we tested the relative predictive ability of Voronoi areas as spatial effects decreased.  
290 We repeated the metric comparison at increasing resource diffusion coefficients  $D_R$ , spanning

291 a range that at the low end is similar to the diffusion coefficient of a large protein such as  
292 bovine serum albumin in 1% agar ( $\sim 1 \times 10^{-7} \text{ cm}^2 / \text{s}$ ), passing the typical diffusion coefficient for  
293 sugars ( $\sim 5 \times 10^{-6} \text{ cm}^2 / \text{s}$ ), and reaching past the diffusion coefficient of sodium chloride ( $\sim 1.5 \times 10^{-5}$   
294  $\text{cm}^2 / \text{s}$ ) (Schantz & Lauffer 1962). Even as the resource diffusion coefficient increased, causing  
295 competition to become more global (described below), the Voronoi areas were still the best  
296 predictors of yields (Supp. Fig 1). Therefore, we concluded that the territory closest to a colony,  
297 obtained using a Voronoi diagram and determined by the competitors which are in adjacent  
298 Voronoi areas, is generally the best predictor for how competition for diffusing resources  
299 affects colony size.

300

301 *The influence of Voronoi neighbors is determined by the competing effects of resource uptake*  
302 *and diffusion*

303

304 Our results above show that Voronoi area is the best metric for capturing the effect of location  
305 on colony size, so we next used this metric to investigate how diffusion and resource usage  
306 parameters influence the strength of spatial effects. To analyze the impact of diffusion and  
307 uptake we focused on the slope of the line that is generated when plotting  $\frac{\text{yield}_i}{\sum \text{yield}}$  against  
308  $\frac{\text{Voronoiarea}_i}{\text{totalarea}}$ , for individual colonies. If each colony has exclusive access to the resources in its  
309 territory, the plot should generate a line with a slope of 1. A smaller slope represents increased  
310 movement of resources between Voronoi areas. For example, if a plot of  $\frac{\text{yield}_i}{\sum \text{yield}}$  over  
311  $\frac{\text{Voronoiarea}_i}{\text{totalarea}}$  yields a line with a slope of 0.5, a two-fold increase in a colony's Voronoi area only

312 allows that colony to consume one-fold more resources (since all resources all turned into  
313 biomass, independent of rate). In a situation where the slope equals 0, the yield of colonies is  
314 largely the same and independent of Voronoi areas (Fig. 4A). Intuitively, a decrease in the slope  
315 should occur as competition becomes more global. These interpretations are consistent with  
316 the observation that a decrease in the slope, which we deemed the “relative effect of Voronoi  
317 area”, goes along with a decrease in the yield coefficient of variation and the  $R^2$  of the plot  
318 (Fig. 4B) when varying any parameter ( $v_{max}$ ,  $k_m$ ,  $R$ ,  $D_B$ , or  $D_R$ ). The correlation between these  
319 metrics indicates that parameters that reduce the slope also reduce the amount of variation in  
320 colony size and the predictive ability of Voronoi areas.

321

322 We next tested what parameters in the model altered the relative effect of Voronoi area.  
323 Increasing the rate at which colonies consume nutrients increased the relative effect of Voronoi  
324 area. The effects of changing the upper limit on uptake rate ( $V_{max}$ ), the saturation constant  
325 ( $k_m$ ), or the initial resource concentration ( $R$ ) all collapsed into a single effect, the maximum  
326 uptake rate, by calculating the Monod maximum uptake using  $V_{max} * R / (k_m + R)$  (Figure 4C).  
327 Increasing the maximum uptake rate caused a fast increase in the relative effect of Voronoi  
328 areas until saturating.

329

330 We next investigated the influence of biomass and resource diffusion. Increasing the biomass  
331 diffusion coefficient ( $D_B$ ) increased the relative effect of Voronoi area (Fig. 4D). We  
332 hypothesize this effect was due to a concomitant increase in the rate at which colonies took up  
333 resources that occurred because colonies spread more quickly and were able to reach high

334 resource concentration zones faster. In otherwise identical simulations, faster biomass diffusion  
335 did increase the speed at which resources were consumed (Supp. Fig 2).

336

337 In contrast to the effect of resource uptake and biomass diffusion, increasing resource diffusion  
338 ( $D_R$ ) *reduced* the relative effect of Voronoi areas. As the resource diffusion coefficient  
339 increases, the relative impact of Voronoi neighbors decays (Fig. 4E) likely because diffusion  
340 outpaces resource uptake. As a result the impact of Voronoi neighbors is determined by the  
341 interplay of nutrient uptake and diffusion (Fig 4 F).

342

343 *In laboratory experiments, growth rate predicts the relative effect of Voronoi area*

344

345 We tested the predicted explanatory power of growth parameters on our laboratory data from  
346 Fig. 1. In every treatment, the colony sizes scaled with the colonies' Voronoi area, as seen in the  
347 scatterplots with data from four Petri dishes per treatment shown in Fig. 5A. The relative effect  
348 of Voronoi area depended on the species and the environment, Fig. 5B (two-way ANOVA, effect  
349 of media:  $F(4,36) = 40.6$ ,  $p < 1e-10$ ), no main effect of species, interaction between  
350 media:species:  $F(2,36) = 5.88$ ,  $p = 0.0062$ ).

351

352 In simulations, the maximum growth rate and resource uptake rate were directly proportional,  
353 and we showed that increasing the maximum uptake rate increased the relative effect of  
354 Voronoi area. In the laboratory data, we measured the maximum growth rate as the increase in  
355 diameter over the first three hours after colonies were identified (Palumbo et al. 1971). Media



356 and species each caused significant differences in the maximum growth rate, Fig. 5C (ANOVA,  
357 effect of media:  $F(4,38) = 260$ ,  $p < 2e-16$ , effect of species:  $F(1,38) = 28.2$ ,  $p = 5.1e-6$ ).  
358 Furthermore, in agreement with simulations, the relative effect of Voronoi area in laboratory  
359 experiments increased as maximum growth rate increased following a saturating function (Fig.  
360 5C). However, there was the appearance of an outlier: *S. enterica* grown on glucose.  
361  
362 *S. enterica* grown on glucose appeared not to follow the growth rate—Voronoi effect trend (Fig.  
363 5C), and also was the treatment most poorly predicted by the genome-scale metabolic  
364 modeling (Fig. 2B). This led us to hypothesize that another biological phenomenon besides  
365 competition for diffusing resources was occurring in this treatment. Interestingly, Voronoi areas  
366 and metabolic models did a good job of predicting the size of small colonies however, large  
367 colonies were routinely smaller than predicted (Fig. 2B). This suggests that large colonies  
368 stopped growing before they ran out of resources. *S. enterica* can generate potentially-toxic  
369 acetate during growth on glucose, so we hypothesized that acetate accumulation arrested  
370 growth of large colonies (Cappuyns et al. 2009; Wolfe 2005; Rhee et al. 2003). To test this  
371 hypothesis we grew *S. enterica* on Petri dishes with glucose medium with or without  
372 supplemented acetate (each at the same concentration as used in single carbon cultures),  
373 reasoning that if acetate was accumulating and causing toxicity, thereby reducing the spatial  
374 effects, supplementing acetate would further reduce the spatial effect. Consistent with our  
375 hypothesis supplemental acetate (but not growth on acetate alone) reduced the growth of the  
376 colonies (Fig. 6A) and the relative effect of Voronoi area (Fig. 6B). Furthermore, genome-scale  
377 metabolic modeling (which does not model toxicity) better recapitulated the laboratory data at

378 an earlier time point, when less acetate would have accumulated. This was true for *S. enterica*  
379 on glucose, as well as for *E. coli* on glucose or lactose, each of which can cause acetate  
380 accumulation (Fig. 6C) (Wolfe 2005).

381

## 382 **Discussion**

383 Understanding the quantitative way that spatial proximity affects interactions between  
384 bacterial colonies will allow us to better understand and manage microbial ecosystems. We  
385 showed that while species identity and the resources present caused variations in the effect of  
386 colony proximity, we could nevertheless predict much of this variance using models accounting  
387 for metabolism and diffusion. Spatially-dependent variation in colony size was largest on media  
388 which promoted a fast growth rate. Specific colony sizes were best predicted using Voronoi  
389 diagrams, which means that the differential colony growth was primarily caused by adjacent  
390 competitors (the “Voronoi neighbors”) (Okabe et al. 2000). The specific influence of these  
391 Voronoi neighbors was determined by a balance between the rate at which colonies took up  
392 resources, and resource diffusion. High uptake rates increased the importance of Voronoi  
393 neighbors and caused greater spatially-dependent variance in colony size. This general  
394 ecological relationship held across species and environments and therefore serves as a useful  
395 null model from which to predict spatial effects caused by resource competition. We  
396 demonstrated the utility of this null model: experiments in which Voronoi neighbors had less  
397 influence than would be predicted from growth rate led us to suggest that the toxicity of  
398 organic acid byproducts plays an important role in limiting colony size when bacteria are  
399 growing on sugars. In summary, we provide an experimentally and theoretically grounded

400 understanding of how location interacts with metabolism and diffusion to influence microbial  
401 interactions.

402

403 We found that the impact of location on microbial growth was strongly influenced by both  
404 species and resource identity. This finding highlights the fact that the impact of spatial structure  
405 is context-dependent. While a dichotomy between structured and unstructured environments  
406 has value (Kim et al. 2008; Kerr et al. 2002; Chao & Levin 1981), it is important to realize that  
407 the effect of structure can change dramatically in different environments (Allen et al. 2013). As  
408 we strive to understand interaction strengths in natural microbial communities and design  
409 spatially-structured ecosystems for technological applications, it will be vital to incorporate  
410 context-dependent effects of location.

411

412 Encouragingly, spatially-explicit, genome-scale metabolic models were able to predict much of  
413 the variation in colony size by modeling the interaction between diffusion and intracellular  
414 metabolism. This suggests that with models created from sequence data we will be able to  
415 quantitatively predict metabolic microbial interactions in complex, spatially structured  
416 environments. High-throughput methods to generate models from sequence data are  
417 improving (Feist et al. 2009), and therefore spatially explicit tools such as COMETS will be  
418 increasingly useful to generate quantitative predictions of the effect of location on growth and  
419 microbial interactions. As we discuss below, the accuracy of the predictions will be strongly  
420 influenced by realized uptake rates. The upper-limit of uptake ( $V_{max}$ ) must be defined in the  
421 model but will often be difficult to infer from sequence data. However, in our simulations we

422 left the upper-limit for all metabolites set at a canonical value of 10 mmol / gram dry weight /  
423 hr (Harcombe et al. 2014) and still achieved a good match between simulation and experiment.  
424 This suggests that colony-level uptake rates depended more on the stoichiometry of biomass  
425 production on each carbon source than on  $V_{max}$ . Therefore, accurate predictions of  
426 stoichiometry, obtainable from sequence data, may lead to good approximations of the rate at  
427 which growing colonies consume resources even with inexact limits on uptake rates.

428

429 Voronoi diagrams did substantially better at explaining colony variance than did any of the  
430 other metrics that we tried. Dropout simulations show that colonies outside the Voronoi  
431 neighbors have very little influence on variation in colony size. Interestingly, this suggests that  
432 for competition the arrangement of nearby colonies matters more than the specific proximity  
433 of those colonies. One caveat of our findings is that all of our colonies started to grow at  
434 roughly the same time. Had bacteria colonized the plate at different time points, or varied  
435 dramatically in lag time, Voronoi diagrams would likely explain less of the variance. Indeed  
436 differences in lag time have been shown to influence competition for physical space (Lloyd &  
437 Allen 2015), however, lag time had exceedingly little impact on colony variance in our  
438 experiments (data not shown). Additionally, we only looked at interactions with conspecific  
439 colonies. We expect that predicting interactions between species with different resource  
440 uptake rates will require weighted Voronoi diagrams. Finally, in future work it will also be  
441 interesting to investigate how Voronoi diagrams fair in three-dimensional ecosystems, such as  
442 lung infection models (Connell et al. 2014).

443

444 A balance of resource uptake and diffusion determined the extent to which competitive  
445 interactions between bacterial colonies were localized. Any parameter that increased uptake  
446 increased the influence of Voronoi neighbors (up to a limit), but increasing resource diffusion  
447 mitigated this effect. This means that both uptake and diffusion must be considered to  
448 determine the extent to which interactions are local. One might expect non-localized  
449 interactions in aquatic environments due to the low viscosity of the media, but if liquid is static,  
450 and resource-rich, the bacteria nevertheless may interact primarily with Voronoi neighbors.  
451 Conversely, in structured environments where one might expect highly localized interactions, if  
452 nutrient uptake is slow enough, resource diffusion may overpower resource uptake and  
453 globalize the interactions. It is important to note that decreasing the extent to which  
454 competition is local is not equivalent to decreasing competition. The average colony size and  
455 total biomass on a plate are equivalent whether competition is local or global (assuming all  
456 resources are consumed). However, if the balance of uptake and diffusion cause interactions to  
457 be local, spatial location matters, and some colonies will grow much larger than others.  
458  
459 The balance between resource uptake and diffusion provides a null model for colony variance  
460 given resource competition in a spatial environment. If colony growth is mediated by  
461 competition for relatively slowly diffusing resources, then colony size should correlate with  
462 Voronoi area. Departures from this null expectation can help identify circumstances in which  
463 other biological interactions are occurring. In our experiments, colony size of *S. enterica*  
464 correlated poorly with Voronoi area when glucose was the carbon source, despite a fast rate of  
465 growth. Here, waste accumulation appears to have stunted the growth of large colonies. Both

466 *E. coli* and *S. enterica* produce organic acids as a byproduct of growth on sugars, and acetate  
467 toxicity can hinder growth(Wolfe 2005; Vandenberg 1993). This toxicity reduced the relative  
468 importance of location. As production of toxic byproducts is common in the microbial world, it  
469 will be interesting to further investigate how toxicity influences spatial patterns. More broadly,  
470 the detection of toxicity in our system serves as an example of how quantitative analysis can aid  
471 in the identification of species interactions. Different biological phenomena likely cause specific  
472 departures from the null expectations. For instance, we hypothesize that mutualistic  
473 interactions between colonies will cause spatial effects, but of opposite direction to  
474 competition, in which colonies in smaller Voronoi areas have better success. Further research  
475 will be aimed at finding signatures of these and other biological phenomena.

476

477 A quantitative understanding of how location mediates microbial interactions has important  
478 consequences for understanding and harnessing microbial evolutionary ecology. It is well  
479 established that spatial structure matters, can alter the interactions between microbes(Nadell  
480 et al. 2016) and plays a critical role in determining health outcomes(Stacy et al. 2016).

481 Quantifying how space mediates interactions will allow for more rigorous understanding of  
482 community composition, and improve prediction of dynamics such as competitive exclusion.

483 Further, understanding organisms' interaction strengths is critical for understanding the  
484 evolution of microbial traits. For example, it was recently demonstrated that the level of  
485 antibiotic secretion can be explained by the relative strength of interaction with sensitive and  
486 resistant competitors (Gerardin et al., 2016). As technology which allows for fine-scale  
487 placement of cells matures (Xu et al. 2004; Ferris et al. 2013; Connell et al. 2013), we can create

488 spatial arrangements that maximize selection of competitive phenotypes of interest. As we  
489 strive to move beyond descriptions of microbial diversity to explanations and management of  
490 diversity it will be critical to develop quantitative understanding of microbial interactions.

491

492 **Acknowledgements** The authors thank S. Zhuang for advice on the scanning technique and the UMN  
493 theory group for useful discussions. J. Chacón was funded by the Biocatalysis Initiative through UMN.

494  
495  
496

## 497 **References**

498

499 Allen, B., Gore, J. & Nowak, M.A., 2013. Spatial dilemmas of diffusible public goods. *eLife*, 2013(2), pp.1–  
500 11.

501 Allison, S.D., 2005. Cheaters, diffusion and nutrients constrain decomposition by microbial enzymes in  
502 spatially structured environments. *Ecology Letters*, 8(6), pp.626–635.

503 Arrigo, K.R., 2005. Marine microorganisms and global nutrient cycles. *Nature*, 437(7057), pp.343–348.

504 Cappuyns, A.M. et al., 2009. A dynamic model for diauxic growth, overflow metabolism, and AI-2-  
505 mediated cell-cell communication of *Salmonella Typhimurium* based on systems biology concepts.  
506 *Biotechnology and Bioengineering*, 102(1), pp.280–293.

507 Chao, L. & Levin, B.R., 1981. Structured habitats and the evolution of anticompetitor toxins in bacteria.  
508 *Proceedings of the National Academy of Sciences of the United States of America*, 78(10), pp.6324–  
509 6328.

510 Cho, I. & Blaser, M.J., 2012. The human microbiome: at the interface of health and disease. *Nature*  
511 *Reviews Genetics*, 13(4), pp.260–270. Available at: <http://dx.doi.org/10.1038/nrg3182>.

512 Connell, J.L. et al., 2013. 3D printing of microscopic bacterial communities. *Proceedings of the National*  
513 *Academy of Sciences of the United States of America*, 110(46), pp.18380–18385. Available at:  
514 [http://www.pnas.org/content/110/46/18380.full%5Cnpapers3://publication/doi/10.1073/pnas.13](http://www.pnas.org/content/110/46/18380.full%5Cnpapers3://publication/doi/10.1073/pnas.1309729110)  
515 09729110.

516 Connell, J.L. et al., 2014. Real-time monitoring of quorum sensing in 3D-printed bacterial aggregates  
517 using scanning electrochemical microscopy. *Proceedings of the National Academy of Sciences of*  
518 *the United States of America*, 111(51), pp.18255–60. Available at:  
519 [http://www.pnas.org/lookup/doi/10.1073/pnas.1421211111%5Cnhttp://www.ncbi.nlm.nih.gov/p](http://www.pnas.org/lookup/doi/10.1073/pnas.1421211111%5Cnhttp://www.ncbi.nlm.nih.gov/pubmed/25489085)  
520 [ubmed/25489085](http://www.ncbi.nlm.nih.gov/pubmed/25489085).

521 David, L.A. et al., 2015. Gut Microbial Succession Follows Acute Secretory Diarrhea in Humans. *mBio*,  
522 6(3), pp.1–14.

523 Dechesne, A., Or, D. & Smets, B.F., 2008. Limited diffusive fluxes of substrate facilitate coexistence of  
524 two competing bacterial strains. *FEMS Microbiology Ecology*, 64(1), pp.1–8.

525 Delaney, N.F. et al., 2013. Development of an Optimized Medium, Strain and High-Throughput Culturing  
526 Methods for *Methylobacterium extorquens*. *PLoS ONE*, 8(4).

527 Feist, A.M. et al., 2009. Reconstruction of Biochemical Networks in Microbial Organisms. *Nature Reviews*  
528 *Microbiology*, 7(2), pp.129–143.

529 Ferris, C.J. et al., 2013. Biofabrication: An overview of the approaches used for printing of living cells.  
530 *Applied Microbiology and Biotechnology*, 97(10), pp.4243–4258.

531 Foster, K.R. & Bell, T., 2012. Competition, not cooperation, dominates interactions among culturable  
532 microbial species. *Current Biology*, 22(19), pp.1845–1850. Available at:  
533 <http://dx.doi.org/10.1016/j.cub.2012.08.005>.

534 Gandhi, S.R. et al., 2016. Range expansions transition from pulled to pushed waves as growth becomes  
535 more cooperative in an experimental microbial population. *Proceedings of the National Academy*  
536 *of Sciences*, 113(25), pp.6922–6927. Available at:  
537 <http://www.pnas.org/lookup/doi/10.1073/pnas.1521056113>.

538 Gerardin, Y., Springer, M. & Kishony, R., 2016. A competitive trade-off limits the selective advantage of  
539 increased antibiotic production. *Nature Microbiology*, 1(September), p.16175. Available at:



- 540 <http://www.nature.com/articles/nmicrobiol2016175>.
- 541 Germerodt, S. et al., 2016. Pervasive Selection for Cooperative Cross-Feeding in Bacterial Communities.  
542 *PLoS Computational Biology*, 12(6), pp.1–21.
- 543 Gralka, M. et al., 2016. Allele surfing promotes microbial adaptation from standing variation. *Ecology*  
544 *Letters*, 19(8), pp.889–898.
- 545 Greig, D. & Travisano, M., 2008. Density-dependent effects on allelopathic interactions in yeast.  
546 *Evolution*, 62(3), pp.521–527.
- 547 Guillier, L., Pardon, P. & Augustin, J.C., 2006. Automated image analysis of bacterial colony growth as a  
548 tool to study individual lag time distributions of immobilized cells. *Journal of Microbiological*  
549 *Methods*, 65(2), pp.324–334.
- 550 Hallatschek, O. et al., 2007. Genetic drift at expanding frontiers promotes gene segregation. *Proceedings*  
551 *of the National Academy of Sciences of the United States of America*, 104(50), pp.19926–30.  
552 Available at: <http://www.pnas.org/content/104/50/19926.long>.
- 553 Hallatschek, O. & Nelson, D.R., 2010. Life at the front of an expanding population. *Evolution*, 64(1),  
554 pp.193–206.
- 555 Hansen, S.K. et al., 2007. Evolution of species interactions in a biofilm community. *Nature*, 445(7127),  
556 pp.533–536.
- 557 Harcombe, W.R. et al., 2014. Metabolic resource allocation in individual microbes determines ecosystem  
558 interactions and spatial dynamics. *Cell Reports*, 7(4), pp.1104–1115.
- 559 Hibbing, M.E. et al., 2010. Bacterial competition: surviving and thriving in the microbial jungle. *Nature*  
560 *reviews: Microbiology*, 8(January), pp.15–25.
- 561 Kerr, B. et al., 2002. Local dispersal promotes biodiversity in a real-life game of rock-paper-scissors.  
562 *Nature*, 418(6894), pp.171–174.
- 563 Kim, H.J. et al., 2008. Defined spatial structure stabilizes a synthetic multispecies bacterial community.  
564 *Proceedings of the National Academy of Sciences of the United States of America*, 105(47),  
565 pp.18188–18193.
- 566 Korolev, K.S. et al., 2012. Selective sweeps in growing microbial colonies. *Physical Biology*, 9(2).
- 567 Lloyd, D.P. & Allen, R.J., 2015. Competition for space during bacterial colonization of a surface. *Journal of*  
568 *The Royal Society Interface*, 12(110), p.20150608. Available at:  
569 <http://rsif.royalsocietypublishing.org/lookup/doi/10.1098/rsif.2015.0608>.
- 570 Mahadevan, R., Edwards, J.S. & Doyle 3rd, F.J., 2002. Dynamic flux balance analysis of diauxic growth in  
571 *Escherichia coli*. *Biophys J*, 83(3), pp.1331–1340. Available at: [http://dx.doi.org/10.1016/S0006-](http://dx.doi.org/10.1016/S0006-3495(02)73903-9)  
572 [3495\(02\)73903-9](http://dx.doi.org/10.1016/S0006-3495(02)73903-9).
- 573 Mitri, S., Clarke, E. & Foster, K.R., 2015. Resource limitation drives spatial organization in microbial  
574 groups. *The ISME Journal*, 10(6), pp.1–12. Available at: <http://dx.doi.org/10.1038/ismej.2015.208>.
- 575 Mitri, S. & Foster, K.R., 2013. The genotypic view of social interactions in microbial communities. *Annu*  
576 *Rev Genet*, 47, pp.247–273. Available at: <http://www.ncbi.nlm.nih.gov/pubmed/24016192>.
- 577 Momeni, B. et al., 2014. Strong inter-population cooperation leads to partner intermixing in microbial  
578 communities. *eLife*, 3, p.e02945.
- 579 Murray, J.D. (James D., 2002. *Mathematical biology 1, An introduction*, Springer.
- 580 Nadell, C.D., Drescher, K. & Foster, K.R., 2016. Spatial structure, cooperation, and competition in  
581 biofilms. *Nature Reviews Microbiology*, accepted. Available at:  
582 <http://dx.doi.org/10.1038/nrmicro.2016.84>.
- 583 Okabe, A. et al., 2000. *Spatial tessellations: concepts and applications of Voronoi diagrams* 2nd ed., New  
584 York, NY: John Wiley & Sons.
- 585 Orth, J.D. et al., 2011. A comprehensive genome-scale reconstruction of *Escherichia coli* metabolism--  
586 2011. *Molecular systems biology*, 7(535), p.535. Available at:  
587 <http://www.pubmedcentral.nih.gov/articlerender.fcgi?artid=3261703&tool=pmcentrez&rendertyp>

- 588 e=abstract.
- 589 Orth, J.D., Thiele, I. & Palsson, B.Ø., 2010. What is flux balance analysis? *Nature biotechnology*, 28(3),  
590 pp.245–248. Available at: <http://dx.doi.org/10.1038/nbt.1614>.
- 591 Palumbo, S. a et al., 1971. Growth measurements on surface colonies of bacteria. *Journal of general*  
592 *microbiology*, 66(2), pp.137–143.
- 593 Penn, A.S. et al., 2012. Can Simpson’s paradox explain co-operation in *Pseudomonas aeruginosa*  
594 biofilms? *FEMS Immunology and Medical Microbiology*, 65(2), pp.226–235.
- 595 Persat, A. et al., 2015. The mechanical world of bacteria. *Cell*, 161(5), pp.988–997. Available at:  
596 <http://dx.doi.org/10.1016/j.cell.2015.05.005>.
- 597 Pirt, S.J., 1967. A Kinetic Study of the Mode of Growth of Surface Colonies of Bacteria and Fungi. *Journal*  
598 *of general Microbiology*, 47, pp.181–197.
- 599 Raghunathan, A. et al., 2009. Constraint-based analysis of metabolic capacity of *Salmonella typhimurium*  
600 during host-pathogen interaction. *BMC Systems Biology*, 3, p.38. Available at:  
601 <papers3://publication/doi/10.1186/1752-0509-3-38>.
- 602 Rhee, M. et al., 2003. Antimicrobial Effects of Mustard Flour and Acetic Acid against *Escherichia coli*  
603 *Salmonella enterica* Serovar Typhimurium Antimicrobial Effects of Mustard Flour and Acetic Acid  
604 against *Escherichia coli* O157 : H7 , *Listeria monocytogenes* , and *Salmonella ent.* *Appl. Environm.*  
605 *Microbiol.*, 69(5), pp.2959–2963.
- 606 Schantz, E.J. & Lauffer, M.A., 1962. Diffusion Measurements in Agar Gel. *Biochemistry*, 1(4), pp.658–663.  
607 Available at: <http://dx.doi.org/10.1021/bi00910a019>.
- 608 Shade, A. et al., 2012. Fundamentals of microbial community resistance and resilience. *Frontiers in*  
609 *Microbiology*, 3(DEC), pp.1–19.
- 610 Stacy, A. et al., 2014. Bacterial fight-and-flight responses enhance virulence in a polymicrobial infection.  
611 *Proceedings of the National Academy of Sciences of the United States of America*, 111(21),  
612 pp.7819–24. Available at:  
613 <http://www.pubmedcentral.nih.gov/articlerender.fcgi?artid=4040543&tool=pmcentrez&rendertyp>  
614 e=abstract.
- 615 Stacy, A. et al., 2016. The biogeography of polymicrobial infection. *Nature Reviews Microbiology*, 14(2),  
616 pp.93–105. Available at:  
617 <http://www.nature.com/nrmicro/journal/v14/n2/full/nrmicro.2015.8.html%5Cnhttp://www.nature.com/nrmicro/journal/v14/n2/pdf/nrmicro.2015.8.pdf>.
- 618
- 619 Tome, M. & Burkhardt, H.E., 1989. Distance-dependent competition measures for predicting growth of  
620 individual trees. *Forest Science*, 35(3), pp.816–831.
- 621 Vandenberg, P., 1993. Lactic acid bacteria, their metabolic products and interference with microbial  
622 growth. *FEMS Microbiology Reviews*, 12(1–3), pp.221–237. Available at:  
623 <http://www.sciencedirect.com/science/article/pii/016864459390065H>.
- 624 Wimpenny, J.W.T., 1979. The growth and form of bacterial colonies. *J Gen Microbiol*, 114(2), pp.483–  
625 486. Available at: <http://www.ncbi.nlm.nih.gov/pubmed/120410>.
- 626 Wolfe, A.J., 2005. The Acetate Switch The Acetate Switch. *Microbiology and Molecular Biology Reviews*,  
627 69(1), pp.12–50.
- 628 Xu, T. et al., 2004. Construction of High-Density Bacterial Colony Arrays and Patterns by the Ink-Jet  
629 Method. *Biotechnology and Bioengineering*, 85(1), pp.29–33.
- 630

631 **Figure Legends**

632 **Figure 1: The variance in colony yields depends on the species and environment**

633  
634 A) A snapshot of *S. enterica* colonies on LB media (left) and the yields (areas) of those colonies  
635 determined by automated image analysis (right). B) Density distributions of *S. enterica* colony yields  
636 grown on acetate or LB. C) The coefficient of variation of colony yields for each species on each carbon  
637 course. Error bars are standard error of mean.

638  
639 **Figure 2: Genome-scale metabolic modeling recapitulates the variance in colony yields**

640  
641 A) We used genome-scale metabolic modeling in the COMETS platform to test the mechanisms  
642 generating the observed variance in colony yields. The relevant genome-scale metabolic model was  
643 seeded into an environment at the sites from which colonies initiated in experiments. Dynamic flux-  
644 balance-analysis calculations and subsequent metabolite and biomass diffusion were carried out in  
645 discrete time steps for a duration mimicking the laboratory experiments. B) A comparison of the relative  
646 colony yields measured in experiments (y axis) to the relative colony yields predicted by the COMETS  
647 simulations (x axis) for the treatments accessible with COMETs (defined media, i.e. not LB). Each facet  
648 contains data from 4-8 Petri dish experiments / simulations. The black line has slope = 1 and intercept =  
649 0, while the blue lines and surrounding grey are linear regression lines with standard error. A high  $R^2$   
650 suggests that the relative spatial effects are captured by the model, while a slope close to 1 suggests an  
651 accurate prediction of amount of variance in colony yield.

652  
653 **Figure 3: Voronoi diagrams capture the effect of location on yield better than other distance metrics**

654  
655 Four metrics were tested to determine which colonies interact to generate variation in colony size and  
656 to what extent. A-D show a cartoon of the measurement and the metric plotted against simulated  
657 colony yield (biomass). A) The distance to the closest colony, such that the yield of the focal colony  
658 (indicated by the arrow) would be predicted from the distance to colony 1, which is closest, but no other  
659 colony would be considered. B) The inverse linear distance to every colony, such that the yield of the  
660 focal colony would be predicted by the distance to every colony, with each colony's influence inversely  
661 proportional to its distance. C) Like B, but colonies become quadratically less important as distance  
662 increases. D) The territory closest to a colony, described by a Voronoi diagram. Here, the focal colony's  
663 Voronoi area is shown (solid line polygon). A Voronoi diagram divides a plane into areas around colony  
664 initiation sites such that all the space in a territory is closer to its enclosed colony than to any other  
665 colony, which is accomplished by drawing perpendicular lines half-way through lines connecting a focal  
666 colony to Voronoi neighbors. E) A Voronoi diagram drawn for all colony initiation sites on a Petri dish.  
667 For a focal colony (blue), its Voronoi neighbors are the green colonies. F) The percent increase in a focal  
668 colony's yield, after removal of a Voronoi or non-Voronoi neighbor. Error bars are standard error.

669  
670 **Figure 4: Colony resource uptake rate and resource diffusion determine the relative effect of Voronoi**  
671 **area**

672  
673 A) We quantified the relative effect of Voronoi area by measuring the slope of a line through the  
674 standardized colony biomass yields over the colonies' standardized Voronoi areas. A slope = 1 means  
675 that there are strong spatial effects and Voronoi neighbors exert total influence over a focal colony's

676 yield, whereas a slope = 0 means that all colonies exert similar effects regardless of spatial proximity and  
677 therefore competition is global. B) As relative effect of Voronoi area increases, so does the variance  
678 explained by the Voronoi areas ( $100 * R^2$ ) and the coefficient of variation of colony yield when varying  
679 any model parameter. C) The relative effect of Voronoi area increases with the maximum potential per-  
680 mass uptake. Changes from the default (baseline) values (Table 1) in maximum growth rate,  $k_m$ ,  
681 starting resource concentration, or any combination of these parameters (multiple) all have similar  
682 effects. D) The relative effect of Voronoi area increases as the biomass diffusion coefficient increases. E)  
683 The relative effect of Voronoi area decreases as resource diffusion increases. F) The relative effect of  
684 Voronoi area is determined by the balance between the maximum uptake rate of a colony (x axis) and  
685 the rate of resource diffusion (y axis).

686  
687 **Figure 5: The relative effect of Voronoi area changes between experimental treatments but generally**  
688 **scales with the maximum colony growth rate**

689 A) Scatterplots of the yield of *S. enterica* colonies over their Voronoi areas when grown on citrate or LB  
690 media. B) The relative effect of Voronoi area varied from extremely low (*E. coli* on acetate) to high  
691 (either species on LB) in experiments. The gray dots are measurements from individual Petri dishes, and  
692 the black dots and bars are means and standard error of the means, respectively. C) The relative effect  
693 of Voronoi area plotted over the maximum growth rate. The black line is a fit to data, excluding data  
694 from *S. enterica* grown on glucose.

695

696 **Figure 6: Acetate addition or accumulation reduces the relative effect of Voronoi area**

697

698 A) *S. enterica* colonies grown on Petri dishes with glucose alone or with acetate added. The scalebar =  
699 2.5mm. B) The relative effect of Voronoi area with only acetate, only glucose or a combination of the  
700 two. The gray dots are measurements from individual Petri dishes, and the black dots and bars are  
701 means and standard error of the means, respectively. C) The simulations from Fig. 2B, but with the  
702 simulated results taken from 40 hours into the simulation rather than at the end of the experiment (150  
703 hrs). Acetate accumulation is not predicted to occur until 40 hours.

704

705

706 **Supplementary Figure 1: Voronoi areas are the best predictors of yield even as the system becomes**  
707 **more global**

708

709 The amount of yield variance explained by each metric as the resource diffusion rate is increased. The  
710 colony layout is the same as for the data in Fig. 3. Regardless of the diffusion rate, Voronoi areas are the  
711 superior metric.

712

713 **Supplementary Figure 2: Total consumption of the ecosystem's resources occurs more quickly as the**  
714 **biomass diffusion coefficient increases**

715

716 The time step at which 99.9% of the simulated ecosystems' resources were consumed, plotted over the  
717 biomass diffusion constant. All other parameters were held constant. The data is from the same  
718 simulations as shown in Fig. 4D.

719

720

721  
722  
723

| Parameter              | value       | Unit, description                                                    |
|------------------------|-------------|----------------------------------------------------------------------|
| spaceWidth             | 0.05        | Side length of a box, in cm                                          |
| deathRate              | 0           | Constant rate of biomass loss per hour                               |
| allowCellOverlap       | True        | Whether multiple colonies could share a box                          |
| minSpaceBiomass        | 1E-14       | Minimum grams of biomass allowed in a box                            |
| maxSpaceBiomass        | 5E-3        | Maximum grams of biomass allowed in a box                            |
| defaultVmax            | 1           | mmol / gram / hour, max uptake rate or growth rate                   |
| defaultKm              | 0.005       | mM, concentration of half-maximum uptake rate                        |
| exchangeStyle          | Monod Style | Uptake is governed by monod kinetics                                 |
| defaultDiffConst       | 5e-6        | cm <sup>2</sup> / s, diffusion constant of resources / metabolites   |
| flowDiffRate           | 3e-9        | cm <sup>2</sup> / s, diffusion constant of bacterial biomass         |
| numDiffPerStep         | 10          | How many iterations to solve the diffusion equations<br>per timestep |
| timeStep               | 0.1         | Hours, amount of time per timestep                                   |
| Resource concentration | 1e-6        | Mmols of resource initiated in a box                                 |

724 Table 1: Baseline COMETS parameters used for simulations

725

A

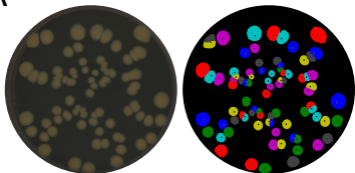

B

*S. enterica*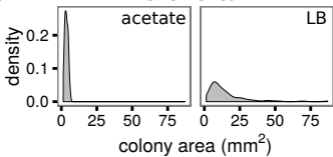

C

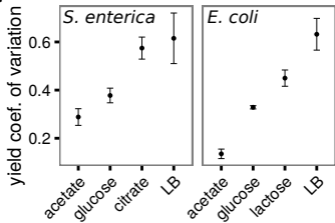

A

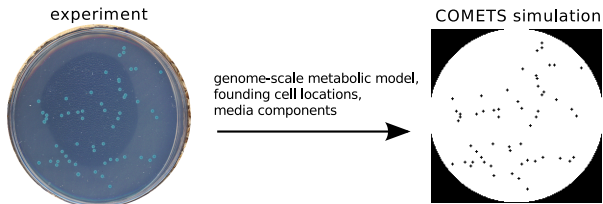

B

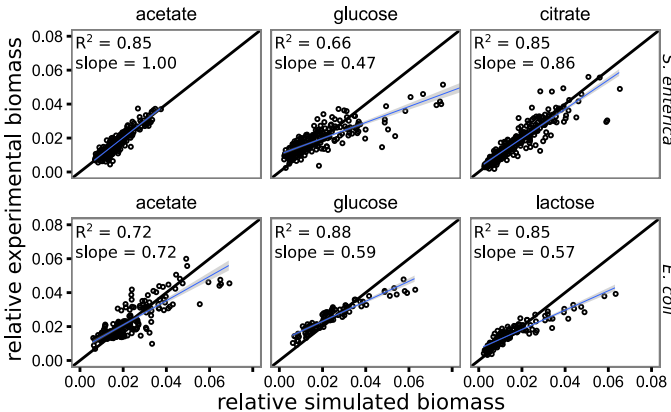

**A**

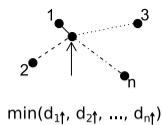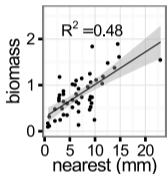

**B**

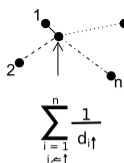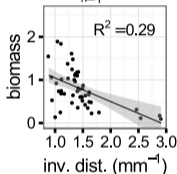

**C**

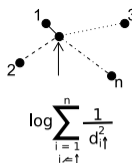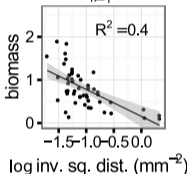

**D**

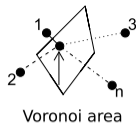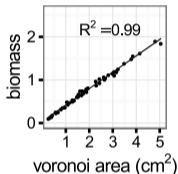

**E** Voronoi diagram separating colony areas

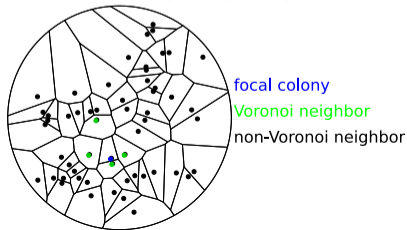

**F**

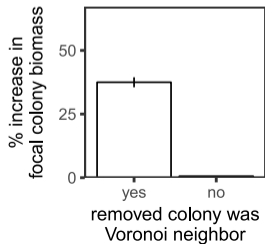



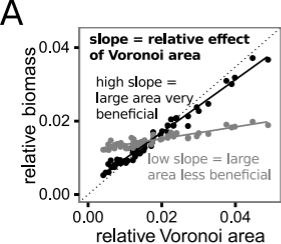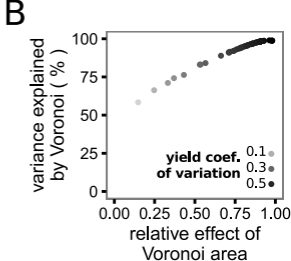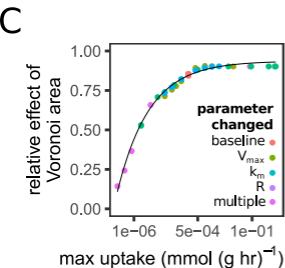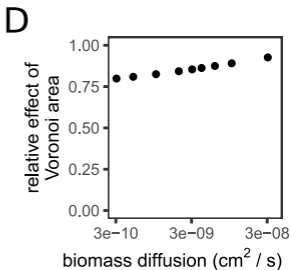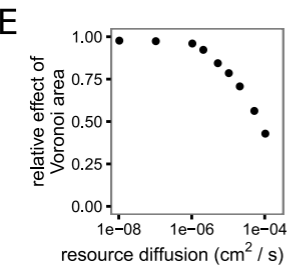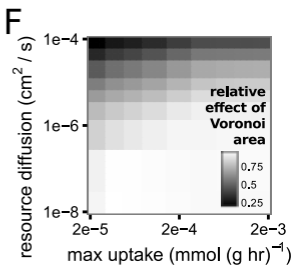

A

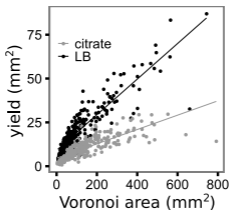

B

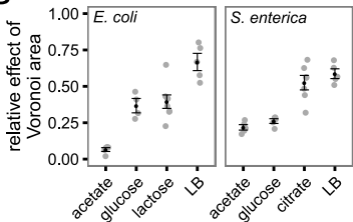

C

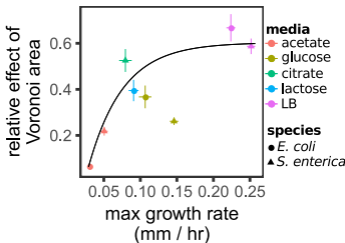

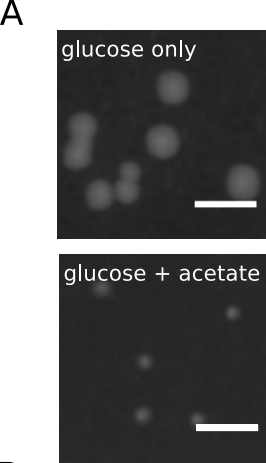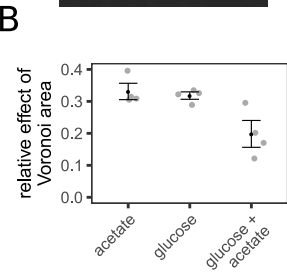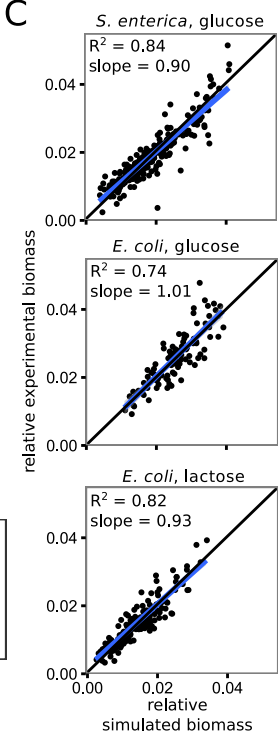

Source: https://www.biorxiv.org/content/10.1101/111153v1.full.pdf
